# Supplementary material
Source: Research Square preprint supplement (doi:10.21203/rs.3.rs-9655439/v1)
Supplement: Supplementary file 1 [file 721ae848e02e297b242ab45b.xlsx]

## Sheet: Hoja1
Supplementary File 1. qPCR primers and probes
Name	Sequence (5'-3')
TevITS1 CF	CCGRAAGTTCACCGATATTG
TevITS1 BR	TGCTGCGTTCTTCAACGAA
Tevansi probe	/6-FAM/ ATGCGAGGT/ZEN/TGATATACA/3IABkFQp/
Tvivax probe	/5CY5/TCCGACCCTCTT/TAO/CTCTTCTCGTCG/3IAbRQSp/
Control probe	/5HEX/TCGATAAAG/ZEN/TAGACCGCCGGTGAC/3IABkFQp/
DNA Internal Control *	ATATTCCGAATCCCTTGTGAAGTAGTAATGTGCGAGCTGAGCGATGTCGCCCGGAAGTTCACCGATATTGCTTCAATAGAGGAAGCAAAAGTCGTAACAAGGTAGCTGTAGGTGAACCTGCAGCTGGATCATTGCCTGATATCCATTATACAAAAAAGAGCATATTTATGTGCATGTATAAATTGCACAGTATGCAACCAAGCATATACATATATGCATATATAGTTCTGTTATTTTCTAATATGTATGTGTGTTAGAGTGTCTGTGTTAATATACTTGCTAATGCATGCTCTACATAATATACAGTAGTAATAACACAGAGAATACGTATGGAATGCGTATCTCTCTATATATATTTATGTATATAGTCACCGGCGGTCTACTTTATCGAATTTTCTC…
* Red: ForwardPrimerSite; Bold: ProbeSite; Orange: ReversePrimerSite
